# Supplementary material for: An exceptionally stable 3D GdIII-organic framework for use as a magnetocaloric refrigerant
Source: Royal Society of Chemistry journal article supplement (doi:10.1039/c4ta06209d), 2015-01-01
Supplement: c4ta06209d1.pdf [file c4ta06209d1.pdf]

## An exceptionally stable 3D Gd<sup>III</sup>-organic framework for use as a magnetocaloric refrigerant

Shaowei Zhang, Eryue Duan and Peng Cheng\*

Department of Chemistry, Key Laboratory of Advanced Energy Materials Chemistry (MOE), and Collaborative Innovation Center of Chemical Science and Engineering, Nankai University, Tianjin 300071, P. R. China. E-mail: pcheng@nankai.edu.cn; Fax: (+86) 22-23502458.

### Supporting Information:

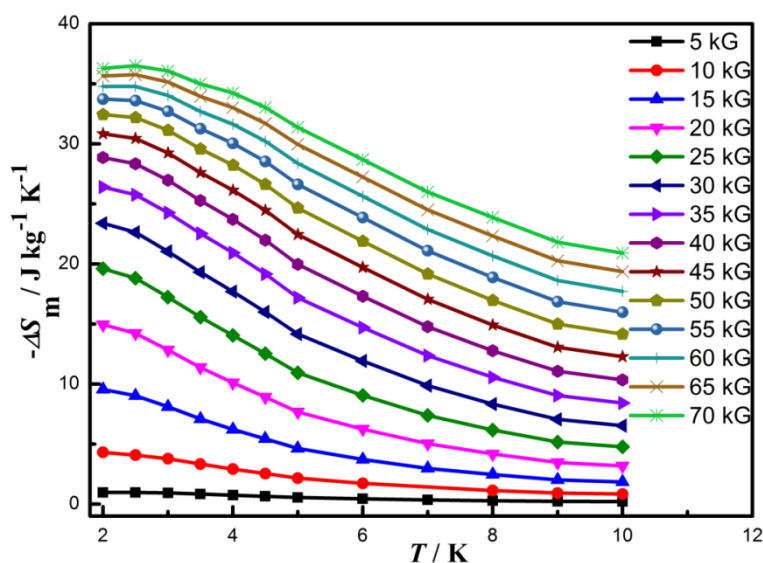

Fig. S1 The entropy change ( $-\Delta S_m$ ) calculated from the magnetization data at  $T = 2 - 10$  K and 5 – 70 kOe.

Table 1 Summary of  $-\Delta S_m^{\max}$  for 3D Gd<sup>III</sup>-containing selected molecule-based materials.

| Compounds                                                                                                                                                                     | $-\Delta S_m^{\max}$<br>( $\text{J} \cdot \text{kg}^{-1} \cdot \text{K}^{-1}$ ) ( $\Delta H$ ) | $-\Delta S_m^{\max}$<br>( $\text{mJ} \cdot \text{cm}^{-3} \cdot \text{K}^{-1}$ ) | Ligands' formula ( $M_r \text{ g} \cdot \text{mol}^{-1}$ ) |
|-------------------------------------------------------------------------------------------------------------------------------------------------------------------------------|------------------------------------------------------------------------------------------------|----------------------------------------------------------------------------------|------------------------------------------------------------|
| $\{\text{Gd}(\text{OH})\text{CO}_3\}_n$ <sup>S1</sup>                                                                                                                         | 66.4 (7 T)                                                                                     | 355                                                                              | $\text{CO}_3^{2-}$ (60.0)                                  |
| $\{\text{Gd}(\text{HCOO})_3\}_n$ <sup>S2</sup>                                                                                                                                | 55.9 (7 T)                                                                                     | 215.7                                                                            | $\text{HCOO}^-$ (45.0)                                     |
| $[\text{Gd}_4(\mu_4\text{-SO}_4)_3(\mu_3\text{-OH})_4(\mu_2\text{-C}_2\text{O}_4)(\mu_2\text{-H}_2\text{O})(\text{H}_2\text{O})_4]_n \cdot n\text{H}_2\text{O}$ <sup>S3</sup> | 51.5 (7 T)                                                                                     | 190.5                                                                            | $\text{C}_2\text{O}_4^{2-}$ (88.0)                         |
| $[\text{Gd}_4(\text{SO}_4)_4(\mu_3\text{-OH})_4(\text{H}_2\text{O})_4]_n$ <sup>S4</sup>                                                                                       | 51.3 (7 T)                                                                                     | 198.9                                                                            | –                                                          |
| $[\text{Gd}_6(\text{OH})_8(\text{suc})_5(\text{H}_2\text{O})_2]_n \cdot 4n\text{H}_2\text{O}$ <sup>S5</sup>                                                                   | 48.0 (7 T)                                                                                     | 144                                                                              | $\text{C}_4\text{H}_4\text{O}_4^{2-}$ (116.1)              |
| $[\text{Gd}(\text{HCOO})(\text{C}_8\text{H}_4\text{O}_4)]_n$ <sup>S6</sup>                                                                                                    | 47.0 (9 T)                                                                                     | 125.11                                                                           | $\text{C}_8\text{H}_4\text{O}_4^{2-}$ (164.1)              |
| $\{[\text{Gd}_6(\mu_6\text{-O})(\mu_3\text{-OH})_8(\mu_4\text{-ClO}_4)_4(\text{H}_2\text{O})_6](\text{OH})_4\}_n$ <sup>S7</sup>                                               | 46.6 (7 T)                                                                                     | 206.8                                                                            | –                                                          |
| $[\text{Ln}(\text{C}_4\text{O}_4)(\text{C}_2\text{O}_4)_{0.5}(\text{H}_2\text{O})_2]_n$ <sup>S8</sup>                                                                         | 44 (7 T)                                                                                       | 127.6                                                                            | $\text{C}_4\text{O}_4^{2-}$ (112.0)                        |
| $[\text{Gd}_2(\text{OH})_2(\text{suc})_2(\text{H}_2\text{O})]_n \cdot 2n\text{H}_2\text{O}$ <sup>S5</sup>                                                                     | 42.8 (7 T)                                                                                     | 120                                                                              | $\text{C}_4\text{H}_4\text{O}_4^{2-}$ (116.1)              |
| $\{[\text{Gd}_2(\text{IDA})_3] \cdot 2\text{H}_2\text{O}\}_n$ <sup>S9</sup>                                                                                                   | 40.6 (7 T)                                                                                     | 100.7                                                                            | $\text{C}_4\text{H}_4\text{NO}_4^{2-}$ (130.1)             |
| $[\text{Gd}(\text{OH})(\text{H}_2\text{O})(\text{abtc})_{0.5}]_n \cdot n\text{H}_2\text{O}$ (This work)                                                                       | 36.6 (7 T)                                                                                     | 97.5                                                                             | $\text{C}_{16}\text{H}_6\text{N}_2\text{O}_8^{4-}$ (354.2) |
| $[\text{Gd}_2(\text{N-BDC})_3(\text{dmf})_4]_n$ <sup>S10</sup>                                                                                                                | 29.0 (7 T)                                                                                     | 41.2                                                                             | $\text{C}_8\text{H}_5\text{NO}_4^{2-}$ (179.1)             |
| $[\text{Gd}_2(\text{azdc})_3(\text{DMA})_2]_n \cdot 2n(\text{DMA})$ <sup>S11</sup>                                                                                            | 22.3 (7 T)                                                                                     | 34.9                                                                             | $\text{C}_{14}\text{H}_8\text{N}_2\text{O}_4^{2-}$ (268.2) |
| $[\text{Gd}_2(\text{fum})_3(\text{H}_2\text{O})_4]_n \cdot 3n\text{H}_2\text{O}$ <sup>S12</sup>                                                                               | 20.7 (5 T)                                                                                     | 52.1                                                                             | $\text{C}_4\text{H}_2\text{O}_4^{2-}$ (114.1)              |

(S1) Y. C. Chen, L. Qin, Z. S. Meng, D. F. Yang, C. Wu, Z. D. Fu, Y. Z. Zheng, J. L. Liu, R. Tarasenko, M. Orendáč, J. Prokleška, V. Sechovský and M. L. Tong, *J. Mater. Chem. A.*, 2014, **2**, 9851.

(S2) G. Lorusso, J. W. Sharples, E. Palacios, O. Roubeau, E. K. Brechin, R. Sessoli, A. Rossin, F. Tuna, E. J. L. McInnes, D. Collison and M. Evangelisti, *Adv. Mater.*, 2013, **25**, 4653.

- (S3) S. D. Han, X. H. Miao, S. J. Liu and X. H. Bu, *Chem. Asian J.*, 2014, **9**, 3116.  
 (S4) S. D. Han, X. H. Miao, S. J. Liu and X. H. Bu, *Inorg. Chem. Front.*, 2014, **1**, 549.  
 (S5) Y. C. Chen, F. S. Guo, Y. Z. Zheng, J. L. Liu, J. D. Leng, R. Tarasenko, M. Orendáč, J. Prokleška, V. Sechovský and M. L. Tong, *Chem. Eur. J.*, 2013, **19**, 13504.  
 (S6) R. Sibille, T. Mazet, B. Malaman, and M. François, *Chem. Eur. J.*, 2012, **18**, 12970.  
 (S7) Y. L. Hou, G. Xiong, P. F. Shi, R. R. Cheng, J. Z. Cui and B. Zhao, *Chem. Commun.*, 2013, **49**, 6066.  
 (S8) S. Biswas, H. S. Jena, A. Adhikary, and S. Konar, *Inorg. Chem.*, 2014, **53**, 3926.  
 (S9) J. M. Jia, S. J. Liu, Y. Cui, S. D. Han, T. L. Hu, and X. H. Bu, *Cryst. Growth Des.*, 2013, **13**, 4631.  
 (S10) G. Lorusso, M. A. Palacios, G. S. Nichol, E. K. Brechin, O. Roubeau, and M. Evangelisti, *Chem. Commun.*, 2012, **48**, 7592.  
 (S11) S. W. Zhang, W. Shi, L. L. Li, E. Y. Duan, and P. Cheng, *Inorg. Chem.*, 2014, **53**, 10340.  
 (S12) L. Sedláková, J. Hanko, A. Orendáčová, M. Orendáč, C. L. Zhou, W. H. Zhu, B. W. Wang, Z. M. Wang, and S. Gao, *J. Alloys Compd.*, 2009, **487**, 425.

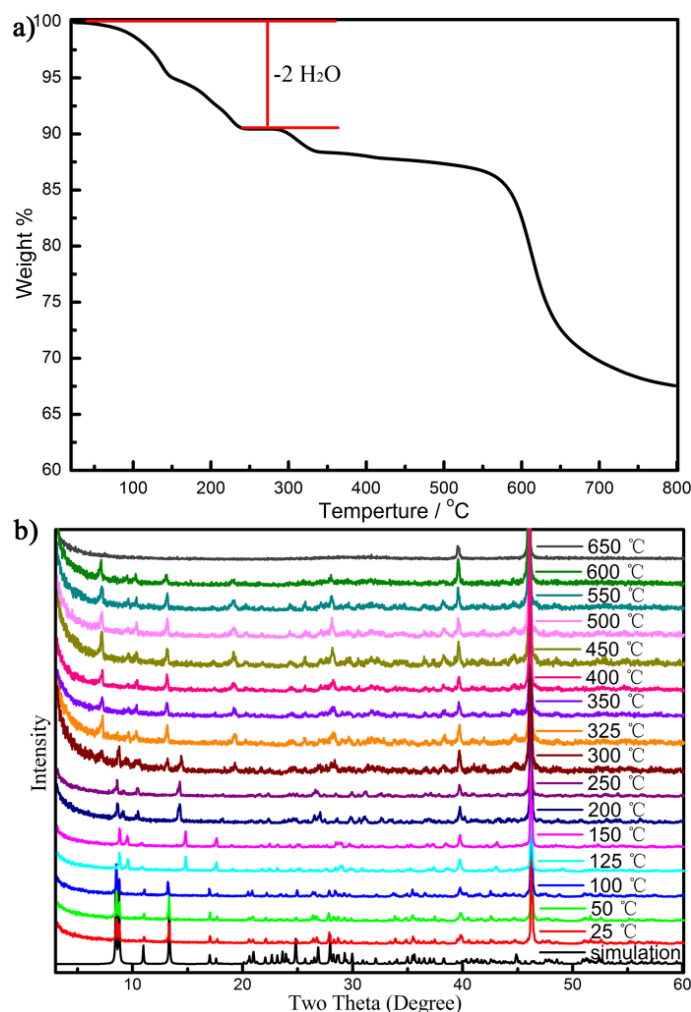

**Fig. S2** (a) The TG curve of **1** on crystalline sample in a  $N_2$  atmosphere in the range of 25 – 800 °C; (b) The in-situ temperature-variable PXRD pattern for **1**, measured on a Pt sample platform under  $N_2$  atmosphere in the range of 25 – 650 °C. The peaks observed at *ca.* 40° and 46.3° are derived from the Pt sample platform.

### TG Analysis and Temperature-variable in-situ PXRD

The thermal stability of **1** was investigated on the crystalline sample under the  $N_2$  atmosphere from 25 to 800 °C, and the thermogravimetric (TG) curve of **1** exhibits slow weight loss in the tested range (Fig. S2a). The weight loss of 9.41% between 25 and 250 °C corresponds to the remove of one lattice water molecule and one coordinated water molecule (calcd. 9.30%). Meanwhile, the temperature-variable *in-situ* PXRD pattern of **1** was also examined on a Pt sample platform from 25 to 650 °C (Fig. S2b). The corresponding PXRD patterns indicate that the structure of **1** remains unchanged after heated to 100 °C. As the temperature increases from 125 °C, the peaks start to shift, which is assumed as the remove of one coordinated water molecule. Above 250 °C, the peaks observed at *ca.* 8 – 10° begin to decrease gradually and disappear finally, and a new peak at *ca.* 7.3° appears, which may indicate that the framework rearranges to produce a new structure or phase, however, we were unfortunately unable to identify or solve the structure of the high-temperature phase. Upon further heating, the diffraction peaks are barely noticeable, implying that the framework of **1** begins to collapse and becomes amorphous. Moreover, the results are consistent with the TG analysis.
